# Supplementary material for: Revealing the impact of the host-salt non-stoichiometry on the performance of perovskite solar cells
Source: Royal Society of Chemistry journal article supplement (doi:10.1039/d3se00530e), 2023-01-01
Supplement: d3se00530e1.pdf [file d3se00530e1.pdf]

## Supplementary Information

*for*

### **Revealing the impact of the host-salt non-stoichiometry on the performance of perovskite solar cells**

Amit Kumar,<sup>a</sup> Bhanu Pratap Dhamaniya,<sup>ab</sup> Shailendra Kumar Gupta,<sup>ac</sup> Priyanka Chhillar,<sup>a</sup>  
Kartiki Chandratre,<sup>a</sup> Sandeep Kumar Pathak,<sup>a</sup> Supravat Karak<sup>\*a</sup>

a. Department of Energy Science and Engineering, Indian Institute of Technology Delhi, Hauz Khas New Delhi-110016, India

b. Present address: U.R.Rao Satellite Centre, Indian Space Research Organisation, Bengaluru 560017, Karnataka India

c. Present address: Amity School of Physical Sciences, Amity University Punjab, IT City, Sector 82A, Mohali, 140308, India

\*Corresponding Author: [supravat@dese.iitd.ac.in](mailto:supravat@dese.iitd.ac.in)

#### Contents

|                                                                                      |    |
|--------------------------------------------------------------------------------------|----|
| A. Experimental Section.....                                                         | 2  |
| 1. Materials.....                                                                    | 2  |
| 2. Solar Cell Fabrication.....                                                       | 2  |
| 3. Characterization.....                                                             | 3  |
| B. Supporting Notes .....                                                            | 5  |
| Note 1 – Photoluminescence quantum efficiency (PLQE) relating $V_{oc,non-rad}$ ..... | 5  |
| Note 2 – Photoluminescence decay fitting.....                                        | 6  |
| Note 3 - Quasi-fermi level splitting (QFLS) calculation .....                        | 7  |
| C. Supporting figures.....                                                           | 8  |
| D. Supporting tables .....                                                           | 21 |
| E. References.....                                                                   | 27 |

## **A. Experimental Section**

### **1. Materials**

Tin (IV) chloride pentahydrate (98%), Tin (II) chloride dihydrate (99.999%), Urea (99.5%), Thioglycolic acid (99%), CsI (99.999%), N,N-Dimethylformamide (99.8%), Dimethyl sulfoxide (99.9%), Anisole (99.7%), Li-TFSI (99.95%) and 4-*tert*-Butylpyridine (98%) were purchased from Sigma Aldrich. 36.5 wt.% Hydrochloric acid (99.999%) from Alfa Aesar. Organic salts  $\text{CH}(\text{NH}_2)_2\text{I}$  (>99.0%) and  $\text{CH}_3\text{NH}_3\text{I}$  (>99.0%) were obtained from Greatcell Solar.  $\text{PbI}_2$  (99.99%) and  $\text{CsCl}$  (>99.0%) acquired from TCI. Spiro-OMeTAD (>99.5%) was purchased from Lumtec. All the salts and solvents were used without further purification.

### **2. Solar Cell Fabrication**

#### **Glass Substrate Preparation**

Fluorine-doped tin oxide (FTO) glass substrates were etched with the help of zinc powder and 2M hydrochloric acid to make desired patterns (Pilkington TEC7, 2.2 mm thick with sheet resistance 7-8 ohm/sq.). The substrates were then rinsed in deionized water (DI water), scrubbed with 1% Hellmanex (by volume in DI water) solution. Followed by sonication in Acetone, DI water and isopropanol for 5 minutes each and dried with the help of nitrogen gun. Finally, the substrates were cured in UV-Ozone chamber for 15 minutes.

#### **Tin Oxide Electron Transport Layer Deposition**

Tin oxide layers were grown over FTO with the help of chemical bath deposition method. 0.05M Tin(IV) Chloride Pentahydrate was prepared in isopropanol by shaking for 30 minutes. The solution was then spin-coated over cured substrates at 3000 rpm for 30 seconds (acceleration 200) and annealed at 180°C for an hour. Chemical bath comprises of 0.250 g urea, 50  $\mu\text{l}$  thioglycolic acid, 2.5 ml hydrochloric acid and tin(II) chloride dihydrate at 0.012M. Substrates were placed in the chemical bath for 3 hours at 70°C in lab oven. Chemically cured substrates were then rinsed & sonicated in DI water for 2 minutes and finally annealed at 180°C for an hour.

#### **Perovskite Precursor Preparation and Deposition**

A 1.45M precursor solution was prepared with caesium chloride (12.20 mg), formamidine hydroiodide (236.88 mg) and lead (II) iodide (668.46 mg). Finally, methylamine hydriodide was

added into precursor with 0, 3, 5, 7, 9, 11, 15 and 20 mol%. All the precursor salts were dissolved in the anhydrous N,N-Dimethylformamide (DMF) and Dimethyl Sulfoxide (DMSO) at the fixed 4:1 vol/vol. Followed by the stirring over a hot plate at 70°C for half an hour. Perovskite thin-film deposition was carried in the dry box with controlled humidity at 10-20%. 70 µl of the precursor was spread over SnO<sub>2</sub> coated FTO substrate and spin at 6000 rpm for 35 seconds (acceleration 2000). 100 µl of anhydrous-Anisole was drenched 10 seconds prior to end the spin program for solvent quenching. The substrates were then immediately transfer over a hot plate at 150°C and annealed for 30 minutes. Then a thin PEAI (5 mM in IPA) deposited on top of perovskite films at 5000 rpm for 30 seconds (acceleration 3000) without annealing. We have fabricated 8 devices for each MAI variation.

### **Spiro-OMeTAD Hole Transport Layer Deposition**

The Spiro-OMeTAD was immediately deposited over perovskite thin-film once the substrates were cooled down, at 2500 rpm for 25 seconds (acceleration 1000). Solution was prepared by dissolving 85 mg/ml Spiro-OMeTAD in chlorobenzene and was then doped with 20 µl bis(trifluoromethane)-sulfonimide lithium (Li-TFSI 500 mg/ml in acetonitrile) & 33 µl 4-tert butylpyridine (tBP). As deposited thin-film, devices were left in the desiccator (<5%RH) overnight for spiro-OMeTAD oxidation.

### **Au Counter-Electrode Deposition**

The desired area of the device was scratched with the help of razor blade for FTO side contact and then 80 nm thick gold layer was thermally deposited under the vacuum of  $6 \times 10^{-6}$  torr.

## **3. Characterization**

The J-V curves were measured using AM1.5 sunlight at 100 mW cm<sup>-2</sup> (Keithley source meter 2400 series, USA) irradiance produced by an Abet class AAB 2000 solar simulator. The intensity was calibrated with an NREL calibrated KG5 filtered reference Si cell. J-V scan ranges from -0.049V to +1.2V with a scan range of 30 mV ms<sup>-1</sup> and 5 seconds initial illumination stabilization time. The device active area was 0.25 cm<sup>2</sup> and 1 cm<sup>2</sup> using a metal aperture mask. The SSPL measurements were performed with Shimadzu RF-6000 series spectrofluorometer and the

perovskite films were prepared over cleaned glass substrate by spin-coating. The PLQE measurement were performed by exciting perovskite thin-films using 532 nm laser source, which is calibrated to measure at 1 sun. TRPL Data was recorded using a time correlated single photon counting (TCSPC) setup (FluoTime 300 PicoQuant GmbH). The samples were prepared over cleaned glass substrate and photoexcited using a 635 nm laser head (LDP-P-C-510, PicoQuant GmbH) of frequency 1MHz and a fluence of 2.41 nJ cm<sup>-2</sup> per pulse. Absorbance spectrum was measured with the help of a Varian Cary 1050UV-VIS spectrophotometer (Agilent Technologies). The measurements were performed using Hitachi (Model S-4800) to acquire SEM images and perovskite films were deposited over FTO/c-SnO<sub>2</sub> layer. Electron beam was accelerated at 5-10.00 KV by the instrument. The XRD measurements were performed over perovskite deposited FTO/c-SnO<sub>2</sub> substrate using PANalytical X'Pert Pro XRD diffractometer with CuK $\alpha$  radiation source ( $\lambda$  1.54 Å).

## B. Supporting Notes

### Note 1 – Photoluminescence quantum efficiency (PLQE) relating $V_{oc,non-rad}$

The theoretical limit of  $V_{oc}$  as per the principle of detailed balance, with considering the case where the radiative recombination of electron-hole pair is only channel for a single-junction cell. This is an assumption considered for the maximum conversion efficiency of a solar cell as of Shockley-Queisser limit<sup>1</sup>. Here, we note the  $V_{oc}$  for cells (practical) in terms of quantum efficiencies where the presence of non-radiative recombination (NRR) processes concludes internal quantum efficiencies smaller than unity<sup>2</sup>. The general form of  $V_{oc}$  expressed as<sup>3,4</sup>:

$$V_{oc} = \frac{K_B T}{q} \ln \left( \frac{J_{SC}}{J_0} \right) \quad (S1)$$

The dark recombination current ( $J_0$ ) and quantum efficiency of luminescence ( $\eta_{EL}$ )<sup>4</sup>:

$$J_0 = \frac{q}{\eta_{EL}} \int EQE_{PV}(E) \Phi_{BB}(E) dE \quad (S2)$$

The photocurrent expressed as by multiplying  $EQE_{PV}$  with solar photon flux  $\Phi_{AM1.5G}$  as a function of energy<sup>3</sup>:

$$J_{SC} = q \int EQE_{PV}(E) \Phi_{AM1.5G}(E) dE \quad (S3)$$

We note that for the ideal case when there is no non-radiative recombination i.e.,  $\eta_{EL}=1$  (equation 2), solar cell are approaching towards max SQ-limit. It is possible when measured  $V_{oc}$  is equal to radiative limit (i.e.,  $V_{oc} = V_{oc,rad}$ , i.e., non-radiative recombination current ( $J_{ne}$ ) is  $\sim 0$  at a given voltage (V)<sup>5</sup>. The  $V_{oc,rad}$  is the radiative limit of open circuit voltage. From above two current expressions, both components are mostly determined by  $EQE_{PV}$ . The equation (S2 and S3) interprets to maximize the  $V_{oc}$  by when  $\eta_{EL}$  unity, it is  $V_{oc}$  radiative limit. And this is the case, when  $EQE_{LED}$  is unity. A solar cell, considering only radiative recombination, should act as LED with a maximum luminescence efficiency. We note that  $V_{oc,rad}$  is still far from  $V_{oc,SQ}$ , as it requires step absorbance. Mathematically, both the terms related as<sup>5</sup>:

$$V_{oc,rad} = V_{oc,SQ} - KT \ln \left( \frac{J_{sc,SQ}}{J_{sc}} \right) - KT \ln \left( \frac{J_{o,rad}}{J_{o,SQ}} \right) \quad (S4)$$

Thus, the open-circuit voltage at max-SQ estimated as:  $qV_{oc,SQ} = 0.941E_{g,PV} - 0.171eV$ <sup>6</sup>. This is expressed in terms of quantum efficiencies with its value at unity and under unity values as more generalized approach. Considering non-radiative recombination losses only<sup>5</sup>:

$$V_{oc,non-rad} = \frac{K_B T}{q} \ln\left(\frac{1}{\eta_{EL}}\right) \quad (S5)$$

Therefore, the equation (S5) shows that low values of  $\eta_{EL}$  owing to NRR channels ( $J_o > 0$ ) accompanied by SRH recombination will result in loss of  $V_{oc}$ , where,  $\eta_{EL} = \chi \Phi_{PL} \eta_{out}$ , where  $\chi$  is light-out coupling factor,  $\chi$  is charge balance factor and  $\Phi_{PL}$  or  $\varphi$  is quantum efficiency of luminescence. From equation S(1-5), the following expression can be obtained (as of reference Rau2007<sup>5</sup>),  $V_{oc} = V_{oc,rad} - V_{oc,non-rad}$ . Mathematically, the relationship between  $V_{oc}$  and recombination can be described as:

$$V_{oc} = \frac{K_B T}{q} \ln\left(\frac{\int_0^{\infty} EQE_{PV}(E) \Phi_{AM1.5G}(E) dE}{\int_0^{\infty} EQE_{PV}(E) \Phi_{BB}(E) dE}\right) - \frac{K_B T}{q} \ln\left(\frac{1}{\eta_{EL}}\right) \quad (S6)$$

The term  $\eta_{EL}$  i.e., luminescence quantum efficiency is result in loss of  $V_{oc}$  if being less than 1, as discussed above. However, the logarithmic relation account for small reduction or improvement.

## Note 2 – Photoluminescence decay fitting

Time-resolved photoluminescence spectroscopy (TRPL) is a powerful technique in understanding recombination kinetics of excited charge-carrier by fast (order of picoseconds) decay, called fluorescence. The lifetime is an intrinsic property of semiconductor material. In a semiconductor material common recombination mechanism are thought to be monomolecular (band-to-band) and bimolecular (trap-mediated recombination). The recombination rate constant is an important parameter and a strong function of initial carrier concentration, which is strongly influenced by the intensity and excitation repetition rate. Fitting of the resultant profile based on monomolecular or bimolecular trapping or bimolecular trapping detrapping model bring further

complexity (for the brief please see reference [7,8]). Therefore, for the simplicity of measurement, here, we consider single exponential fitting model, which we discuss below.

### **Fitting Model–**

Here, the TRPL spectra of perovskite compositions with different MAI concentration using time-correlated single-photon counting (TCSPC). The PL decay was recorded for respective samples at a low 2.41 nJ cm<sup>-2</sup> (pulsed 1 MHz repetition rate) owing to minimize carrier annihilation and non-geminate recombination with a 635nm laser source and characterized by stretched dynamics i.e., by fitting single exponential decay curve as depict by equation (S7).

$$I(t) = I_o e^{-\left(\frac{t}{\tau_c}\right)^\beta} \quad (S7)$$

where  $I(t)$  is the time dependent PL intensity,  $I_o$  is initial PL intensity,  $t$  is time,  $\tau_c$  is characteristic lifetime and  $\beta$  is distribution coefficient.

### **Note 3 - Quasi-fermi level splitting (QFLS) calculation**

The quasi-fermi level splitting (QFLS) is defining the maximum achievable open-circuit voltage ( $E_{FC}$  and  $E_{FV}$ , fermi energy corresponds to conduction band and valence band, respectively), representing the density of photogenerated free charge carriers, under equilibrium. We determined QFLS by following expression<sup>9,10</sup>:

$$QFLS = K_B T \ln \left( PLQY \frac{J_G}{J_{o,rad}} \right) \quad (S8)$$

where  $K_B$  stands for the Boltzmann constant, T absolute temperature and PLQY photoluminescence. The terms  $J_G$  is the generation current and  $J_{o,rad}$  is the dark radiative recombination current, both which are expressed by equation S2 and S3. Under the SQ assumptions, that PLQY is unity, where there are no non-radiative recombination losses will occur, we obtain the expression for ‘QFLS under the radiative limit’:

$$QFLS_{rad} = K_B T \ln \left( \frac{J_G}{J_{o,rad}} \right) \quad (S9)$$

Net QFLS then represented as:

$$QFLS = QFLS_{rad} + K_B T \ln(PLQY) \quad (S10)$$

The expression denoted in second term is representing the losses associated with non-radiative recombination. Therefore, in figure 4(e), we show the contribution of NRR losses in context of  $V_{oc}$  deviation from  $QFLS_{rad}$ .

### C. Supporting figures

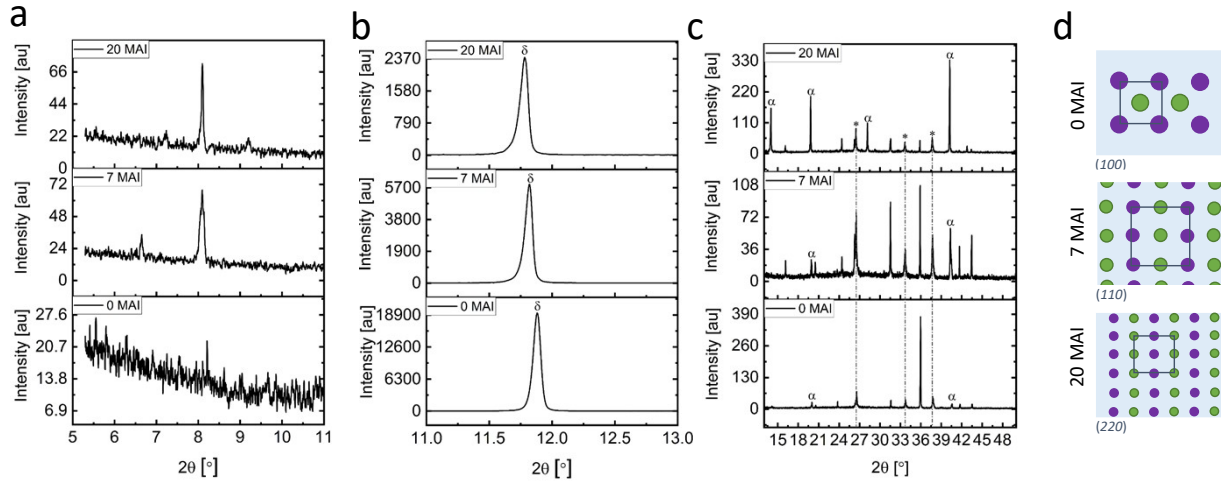

**Fig. S1** The X-ray diffraction spectra of unannealed perovskite compositions with varying MAI concentrations deposited over FTO substrates. The XRD peaks corresponding to cubic phase  $FAPbI_3$  ( $\alpha$  symbol),  $PbI_2$  ( $\delta$  symbol), and FTO (asterisk symbol) are marked. The 2 theta compares in (a) 5-11°, (b) 11-13°, and (c) 13-50°.



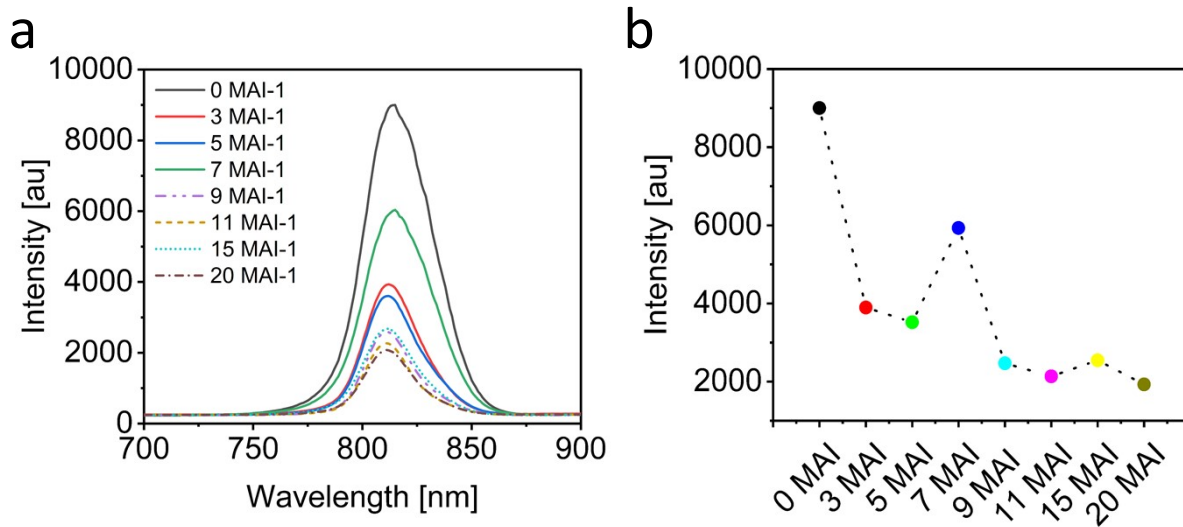

**Fig. S2** Steady state photoluminescence (SSPL) spectra recorded for perovskite thin films as a function of MAI content when exciting by 520nm wavelength is compared in (a) and (b).

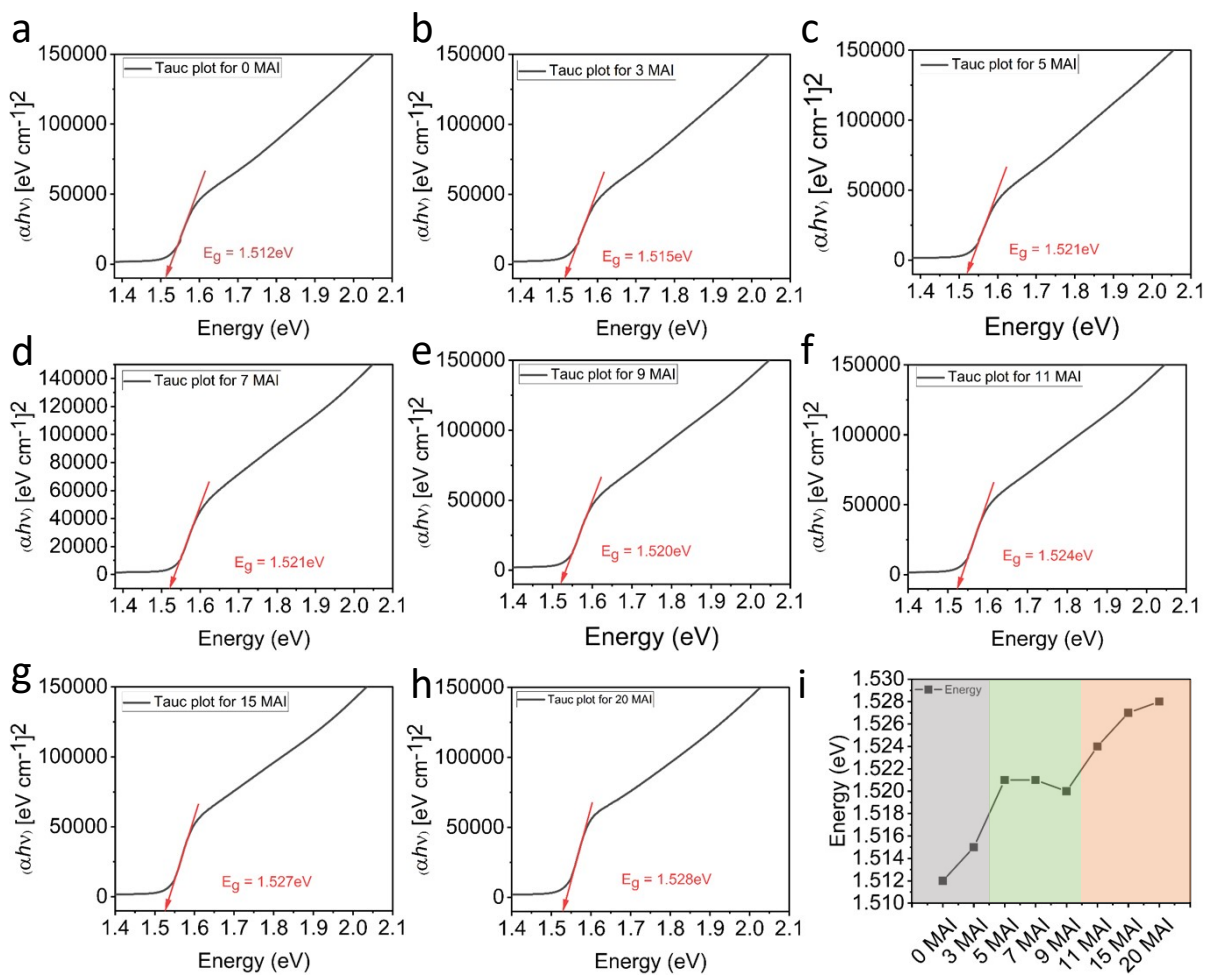

**Fig. S3** Tauc-plot derived from Ultraviolet visible (UV-VIS) spectroscopy absorption coefficient data indicating energy band offset when deposited over glass substrate for the respective samples of (a) 0MAI, (b) 3MAI, (c) 5MAI, (d) 7MAI, (e) 9MAI, (f) 11MAI, (g) 15MAI, (h) 20MAI, and (i) comparing Tauc bandgap as a function of excess MAI.

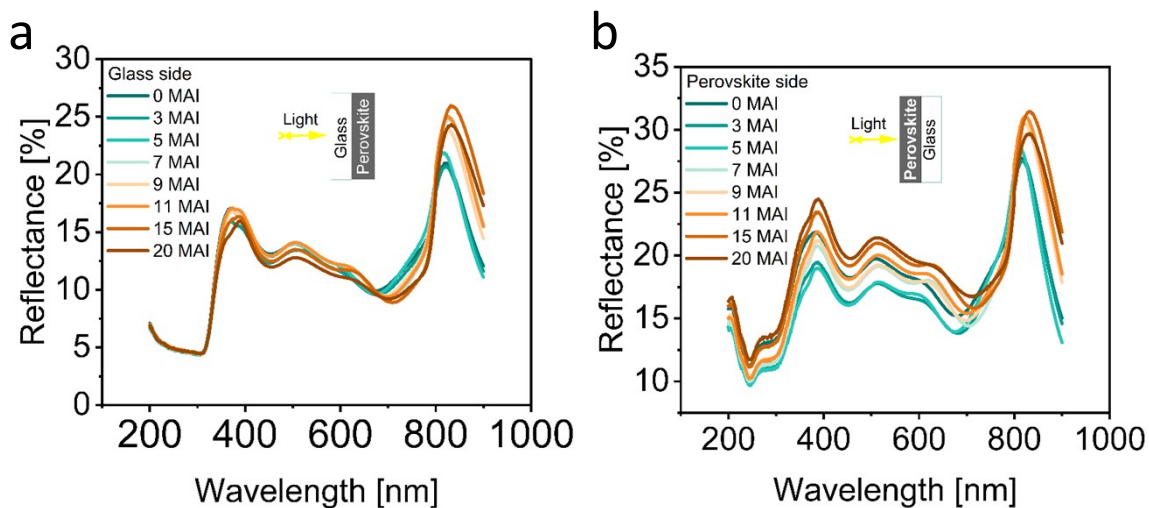

**Fig. S4** Reflectance measurement of perovskite compositions with different MAI concentration measured with the help of Ultraviolet visible (UV-VIS) spectroscopy. (a) Sample illuminated from glass side, and (b) sample illuminated from perovskite side. The inset represents illumination from respective sides.

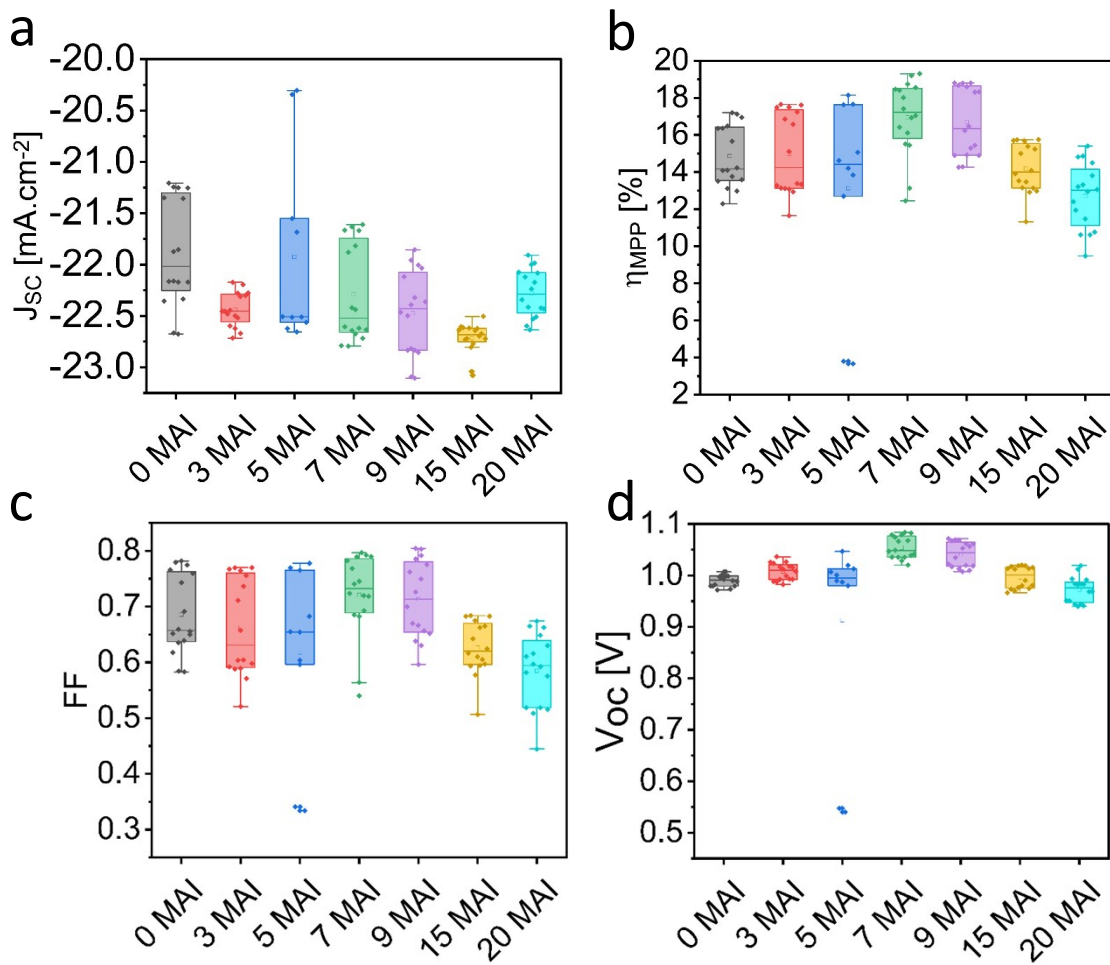

**Fig. S5** Statistical results of regular n-i-p architecture device comprised of FTO/c-SnO<sub>2</sub>/Perovskite/Spiro-OMeTAD/Au for perovskite device as a function of excess MAI content with the parameters of (a)  $J_{sc}$ , (b)  $V_{oc}$ , (c) FF and (d) PCE.

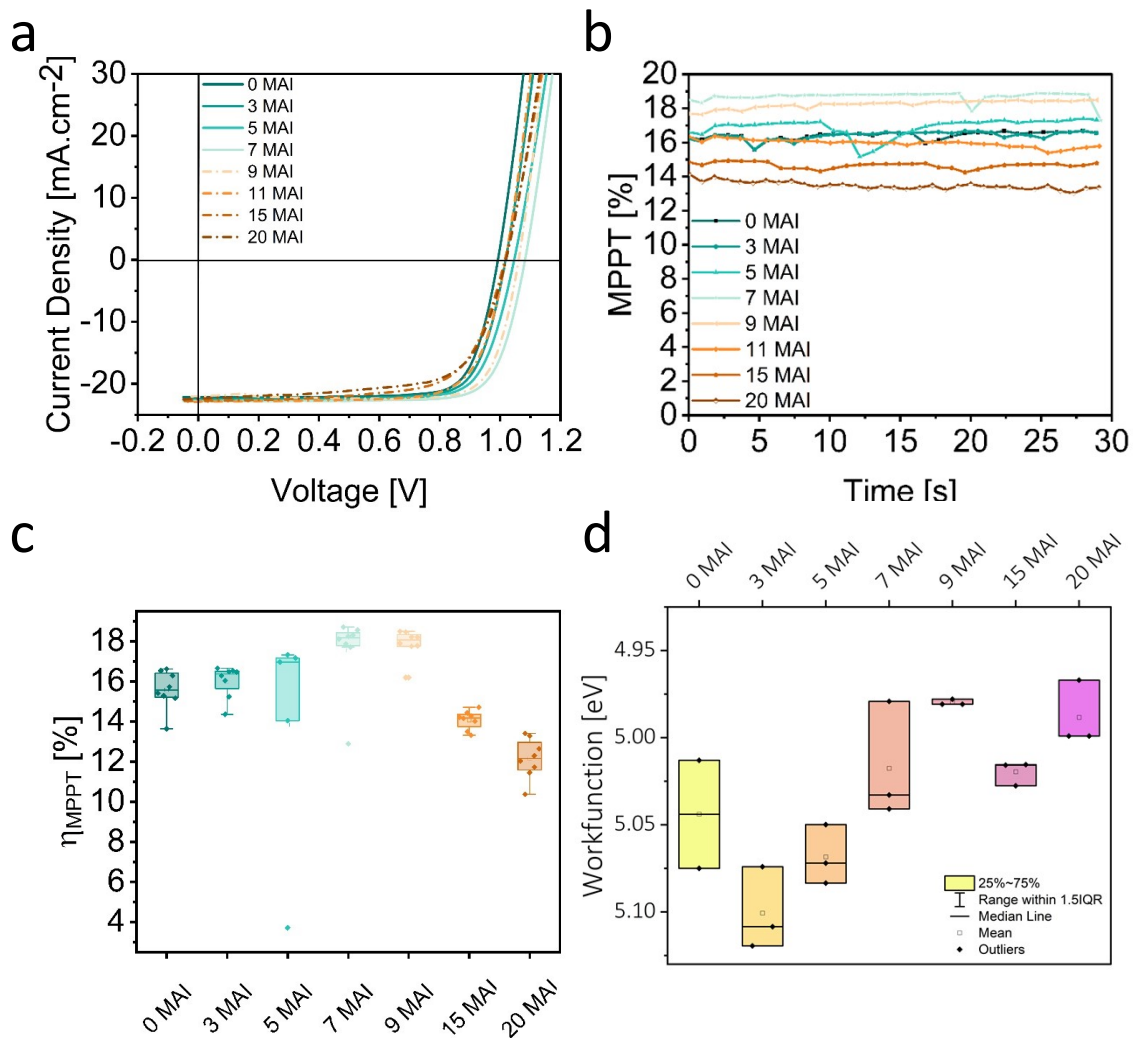

**Fig. S6** Planar heterojunction regular n-i-p architecture device comprised of FTO/c-SnO<sub>2</sub>/Perovskite/Spiro-OMeTAD/Au for perovskite device as a function of excess MAI content. (a) The current density-voltage (J-V) curve, (b) stabilized power output scanned for 30 seconds, and (c) statistical distribution of MPPT after scanned for 30 seconds. (d) Kelvin Probe measurement of various perovskite compositions as a function of MAI content. The perovskite

films were deposited on top of Indium Tin Oxide (ITO) substrates. For reference highly oriented graphene substrate (HOGS) was used and gold tip. The figure shows the statistical distribution where 3 data points were recorded for each sample.

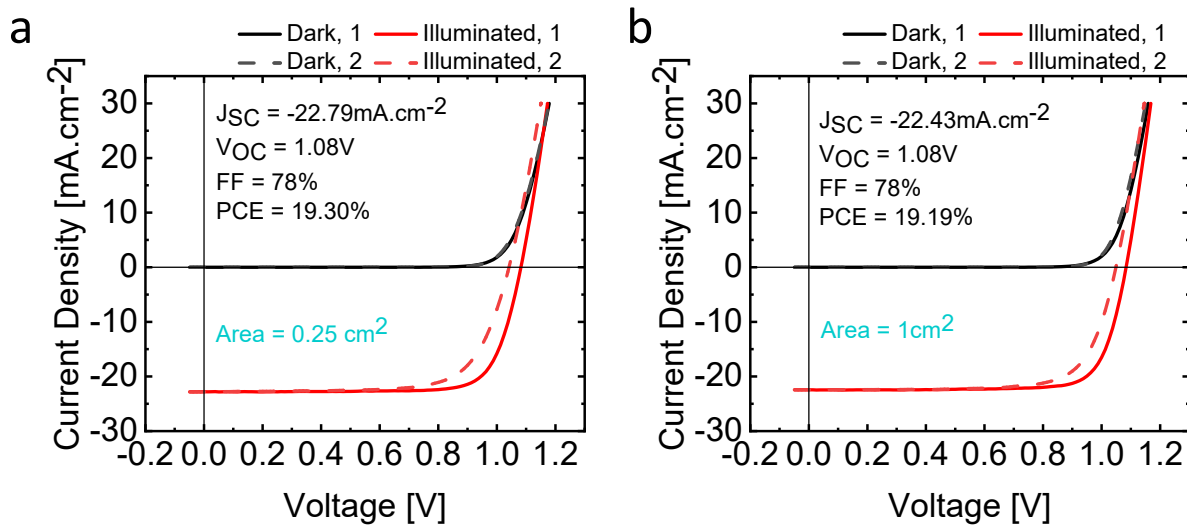

**Fig. S7** The current density-voltage (J-V) curve of planar heterojunction regular n-i-p architecture device comprised of FTO/c-SnO<sub>2</sub>/Perovskite/Spiro-OMeTAD/Au for perovskite device with 7mol% excess MAI content. The aperture area of (a)  $0.25\text{ cm}^2$  and (b)  $1\text{ cm}^2$ .

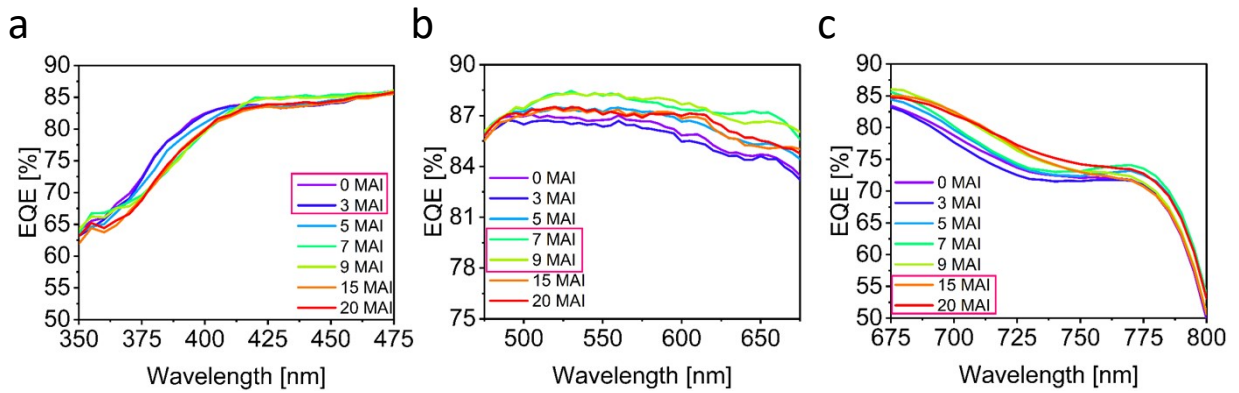

**Fig. S8** External quantum efficiency spectrum of perovskite solar cells as a function of excess MAI content. (a) Respective samples in the high energy range (350-475 nm), (b) broad-range (475-675 nm), and (c) low energy range (675-820 nm).

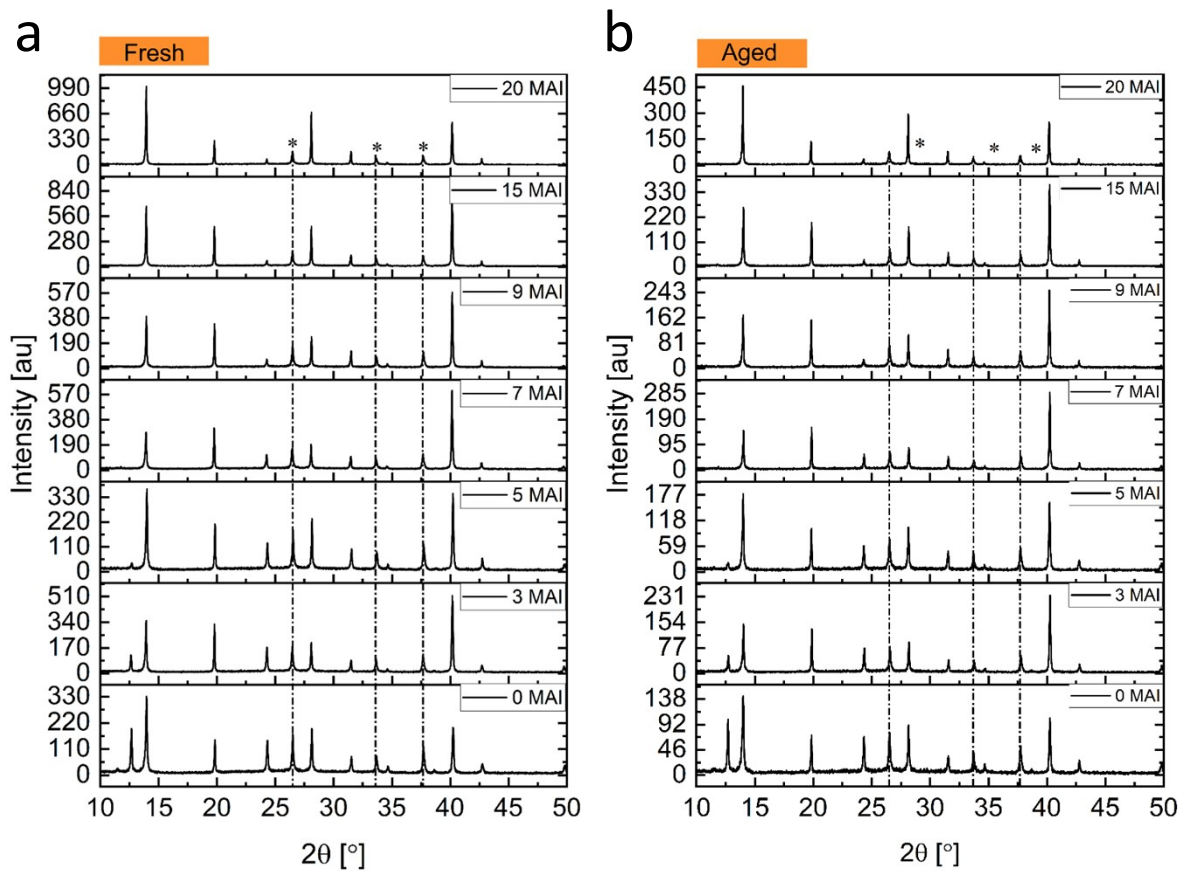

**Fig. S9** The X-ray diffraction spectra of unannealed perovskite compositions with varying MAI concentrations deposited over FTO substrates. The XRD peaks corresponding to cubic phase  $\text{FAPbI}_3$  ( $\alpha$  symbol),  $\text{PbI}_2$  ( $\delta$  symbol), and FTO (asterisk symbol) are marked. (a) Fresh thin-films, and (b) 85 days aged thin-films under dark in inert.



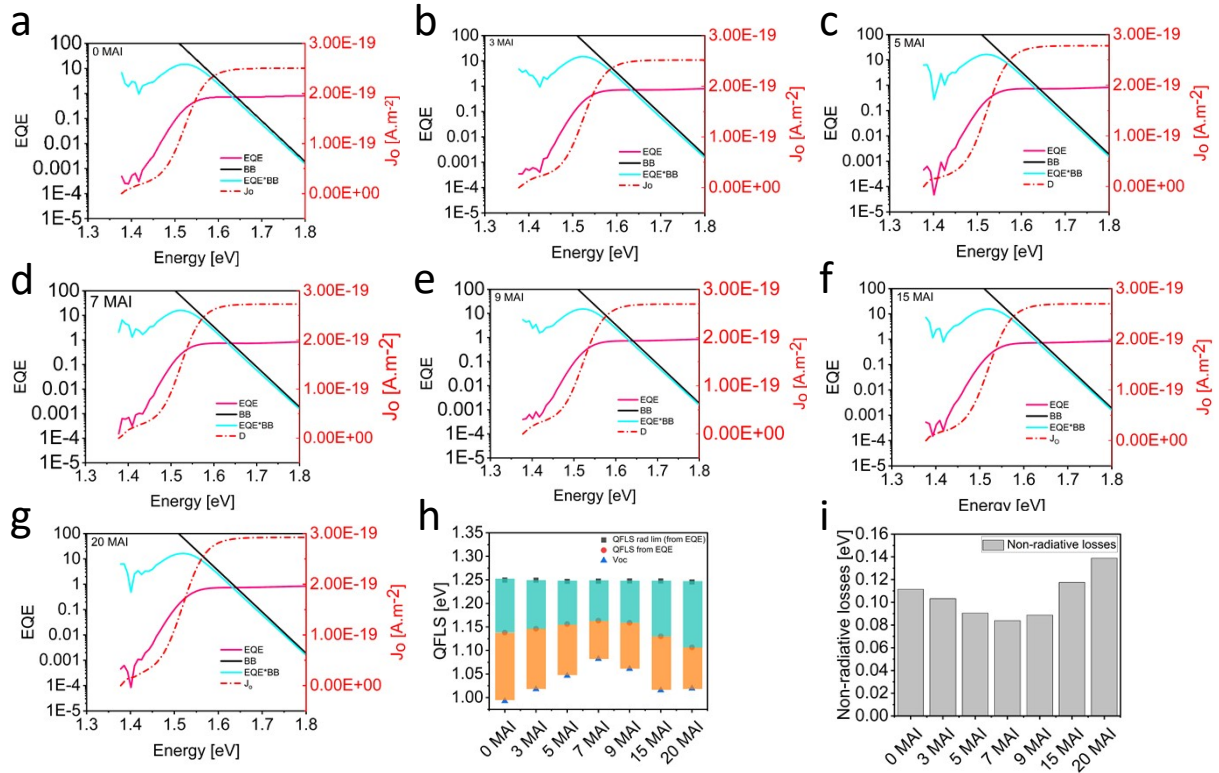

**Fig. S10** The calculation of  $J_{o,rad}$  (equation S2, when luminescence quantum efficiency is unity) by integrating external quantum efficiency (EQE) of our devices and blackbody spectrum ( $\phi_{BB}$ ) of surrounding at 300K, as a function of excess MAI concentration. (a) 0MAI, (b) 3MAI, (c) 5MAI, (d) 7MAI, (e) 9MAI, (f) 15MAI, (g) 20MAI, (h) The black dotted line represents radiative limit for an energy bandgap of 1.53 eV and corresponding calculated QFLS (thin-film), for varying MAI concentration, and (i) Estimated non-radiative recombination losses for different MAI concentration. The low height indicates low NRR's.

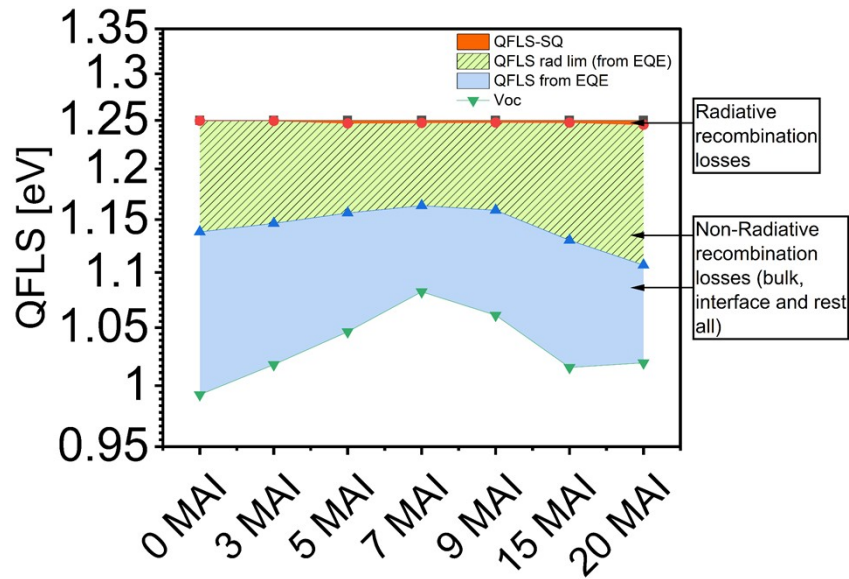

**Fig. S11** The experimentally calculated quasi-fermi level splitting (QFLS) radiative-limit,  $QFLS^{SQ}$  and open-circuit voltage ( $V_{oc}$ ) of a solar cell is presented, as a function of excess MAI into the precursor, for a bandgap of 1.53 eV. The QFLS obtained (see supporting note 3) with the help of luminescence quantum efficiency when perovskite deposited over glass substrate. The  $V_{oc}$  of PV cell under radiative limit ( $V_{oc}^{rad}$ ) is different from ( $V_{oc}^{SQ}$ ) if the absorptance of PV cell deviates from a step function, which is often the case for most of practical PV technology<sup>6</sup>. Moreover, less steep the rise in EQE, the larger is the dark recombination current density ( $J_0$ ) and the larger ( $V_{oc}^{rad}$ ) is different from ( $V_{oc}^{SQ}$ ). The difference in these two  $V_{oc}$  values is referred as radiative recombination losses which we highlight in orange colour<sup>6</sup>. The green shaded and blue region representing non-radiative losses (NRRs). The 7mol% MAI device indicating lowest losses.

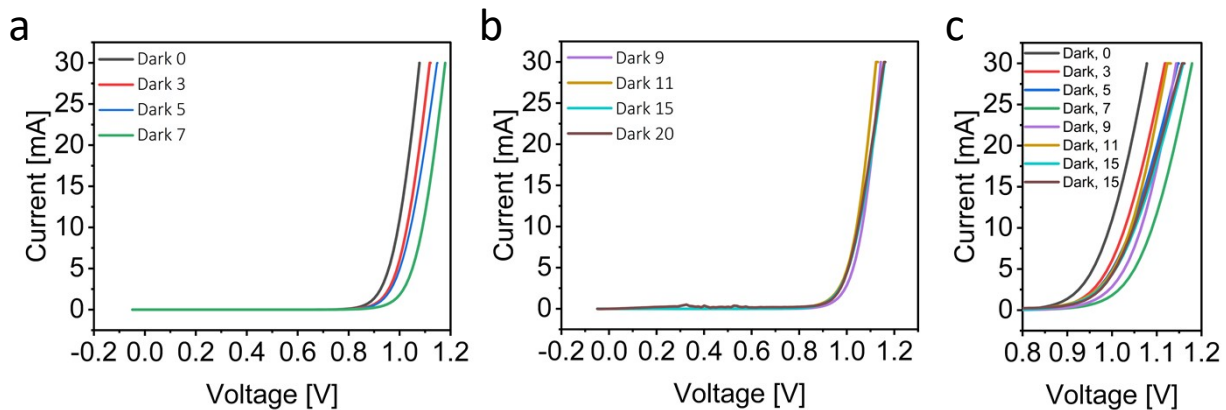

**Fig. S12** The dark I-V measurement of planar n-i-p perovskite solar cells as a function of MAI concentration of (a) 0-7MAI, (b) 9-20MAI, and (c) 0-20MAI.

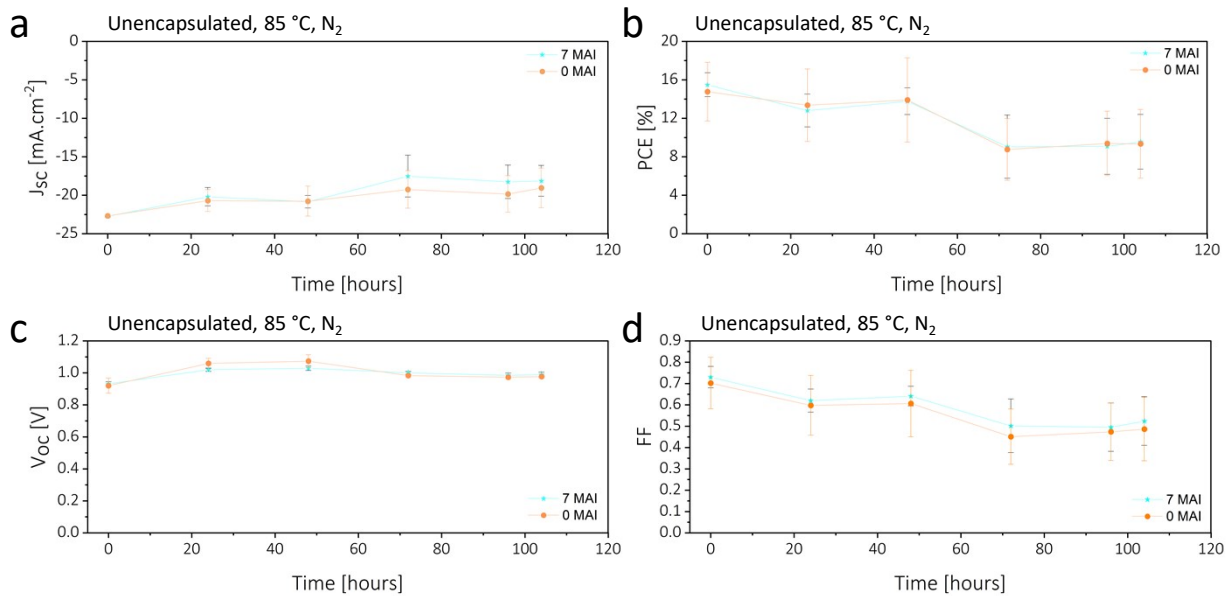

**Fig. S13** Evolution of stability of regular n-i-p architecture device comprised of FTO | c-SnO<sub>2</sub> | Perovskite | Spiro-OMeTAD | Au samples for with (7MAI) and without MAI (0MAI) perovskite compositions. The devices were unencapsulated and kept under dark at 85°C under nitrogen. The error bars are denoted by standard deviation. (a) Current density, (b) Power conversion efficiency, (c) open-circuit voltage and, (d) fill-factor.

## D. Supporting tables

**Table S1** Comparison of perovskite characteristic peak position (2 theta) of (100), (110), (200), and (220) peaks as a function of excess MAI content. The parameters listed in table are extracted from X-ray diffraction spectra and corresponding calculated full width half maximum (FWHM).

| Sample | (100)   |          | (110)   |          | (200)   |          | (220)   |          |
|--------|---------|----------|---------|----------|---------|----------|---------|----------|
|        | FWHM    | peak     | FWHM    | peak     | FWHM    | peak     | FWHM    | peak     |
| 0MAI   | 0.16828 | 13.9543  | 0.10592 | 19.82152 | 0.13986 | 28.12822 | 0.15812 | 40.24166 |
| 3MAI   | 0.14006 | 13.92234 | 0.09277 | 19.78149 | 0.12228 | 28.08681 | 0.13523 | 40.18339 |
| 5MAI   | 0.14913 | 13.97851 | 0.10008 | 19.83065 | 0.11597 | 28.14058 | 0.13927 | 40.22737 |
| 7MAI   | 0.15077 | 13.91145 | 0.10344 | 19.76003 | 0.11782 | 28.07348 | 0.12582 | 40.15473 |
| 9MAI   | 0.11714 | 13.94541 | 0.09273 | 19.78563 | 0.09966 | 28.1027  | 0.11483 | 40.17167 |
| 15MAI  | 0.10516 | 13.93896 | 0.08927 | 19.77455 | 0.09271 | 28.09237 | 0.11455 | 40.16169 |
| 20MAI  | 0.10049 | 13.93989 | 0.08887 | 19.7752  | 0.08754 | 28.09228 | 0.113   | 40.16237 |

**Table S2** Time correlated single photon counting (TCSPC) decays measurement for perovskite samples with different perovskite composition. The samples were illuminated from the perovskite side with a 635 nm laser at a fluence of 2.41 nJ cm<sup>-2</sup> represents PL lifetime of perovskite compositions as a function of excess MAI content.

| Sample | Average lifetime |
|--------|------------------|
|        | s                |
| 0MAI   | 201.79           |
| 3MAI   | 218.63           |
| 5MAI   | 231.06           |
| 7MAI   | 236.18           |
| 9MAI   | 231.76           |
| 11MAI  | 229.66           |
| 15MAI  | 205.57           |
| 20MAI  | 104.32           |

**Table S3** Photovoltaic parameters of regular n-i-p solar cells extracted for perovskite compositions with different MAI content. The devices were scanned in both reverse and forward bias direction under simulated air mass 1.5 sunlight.

|       | Scan direction | $V_{oc}$ [V]        |                  | $J_{sc}$ [mA.cm <sup>-2</sup> ] |                  | FF [%]              |                  | Efficiency [%]      |                  |
|-------|----------------|---------------------|------------------|---------------------------------|------------------|---------------------|------------------|---------------------|------------------|
|       |                | 0.25cm <sup>2</sup> | 1cm <sup>2</sup> | 0.25cm <sup>2</sup>             | 1cm <sup>2</sup> | 0.25cm <sup>2</sup> | 1cm <sup>2</sup> | 0.25cm <sup>2</sup> | 1cm <sup>2</sup> |
| 0MAI  | Reverse        | 0.99                | 0.99             | -22.16                          | -22.67           | 78.17               | 69.10            | 17.20               | 15.66            |
|       | Forward        | 0.97                | 0.98             | -22.16                          | -22.66           | 63.89               | 58.27            | 13.76               | 12.97            |
| 3MAI  | Reverse        | 1.01                | 1.02             | -22.51                          | -22.71           | 76.99               | 71.09            | 17.64               | 16.57            |
|       | Forward        | 0.98                | 0.99             | -22.45                          | -22.67           | 59.22               | 57.08            | 13.13               | 12.93            |
| 5MAI  | Reverse        | 1.04                | 1.01             | -22.65                          | -23.08           | 76.54               | 72               | 18.14               | 16.85            |
|       | Forward        | 1.01                | 0.96             | -22.62                          | -23.07           | 60.37               | 57.85            | 13.83               | 12.91            |
| 7MAI  | Reverse        | 1.08                | 1.08             | -22.79                          | -22.43           | 78.26               | 78.95            | 19.30               | 19.19            |
|       | Forward        | 1.04                | 1.04             | -22.79                          | -22.41           | 71.80               | 74.03            | 17.04               | 17.41            |
| 9MAI  | Reverse        | 1.06                | 1.06             | -22.03                          | -22.83           | 80.44               | 77.57            | 18.80               | 18.80            |
|       | Forward        | 1.01                | 1.01             | -21.95                          | -22.85           | 72.61               | 65.63            | 16.23               | 15.29            |
| 11MAI | Reverse        | 1.01                | 1.02             | -22.88                          | -22.97           | 74.04               | 72.52            | 17.24               | 17.10            |
|       | Forward        | 0.96                | 0.99             | -22.83                          | -22.93           | 64.67               | 64.86            | 14.30               | 14.76            |
| 15MAI | Reverse        | 1.01                | 1.01             | -22.72                          | -23.07           | 68.25               | 64.21            | 15.74               | 14.99            |
|       | Forward        | 0.98                | 0.97             | -22.72                          | -23.04           | 62.41               | 50.64            | 13.90               | 11.32            |
| 20MAI | Reverse        | 1.01                | 1.01             | -22.41                          | -22.63           | 67.39               | 64.87            | 15.39               | 14.85            |
|       | Forward        | 0.96                | 0.96             | -22.34                          | -22.59           | 61.07               | 59.63            | 13.21               | 13.05            |

**Table S4** The average Photovoltaic parameters of regular n-i-p solar cells extracted for perovskite compositions with different MAI content. Each data point is an average value from 8 devices for each composition. The devices were scanned in both reverse and forward bias direction under simulated air mass 1.5 sunlight.

|       | Scan direction | $V_{oc}$ [V] |           | $J_{sc}$ [mA.cm <sup>-2</sup> ] |           | FF [%]  |           | Efficiency [%] |           |
|-------|----------------|--------------|-----------|---------------------------------|-----------|---------|-----------|----------------|-----------|
|       |                | Average      | Std. Dev. | Average                         | Std. Dev. | Average | Std. Dev. | Average        | Std. Dev. |
| 0MAI  | Reverse        | 0.99         | 0.005     | -21.88                          | 0.54      | 74.42   | 0.045     | 16.27          | 1.01      |
|       | Forward        | 0.98         | 0.006     | -21.87                          | 0.55      | 62.69   | 0.029     | 13.44          | 0.63      |
| 3MAI  | Reverse        | 1.02         | 0.007     | -22.44                          | 0.18      | 74.15   | 0.039     | 17.00          | 0.85      |
|       | Forward        | 0.99         | 0.007     | -22.42                          | 0.16      | 58.33   | 0.027     | 12.98          | 0.56      |
| 5MAI  | Reverse        | 1.02         | 0.020     | -22.55                          | 0.08      | 77.07   | 0.006     | 17.81          | 0.29      |
|       | Forward        | 0.90         | 0.199     | -21.91                          | 0.98      | 57.57   | 0.136     | 13.83          | 1.03      |
| 7MAI  | Reverse        | 1.07         | 0.006     | -22.23                          | 0.50      | 78.05   | 0.018     | 18.67          | 0.45      |
|       | Forward        | 1.03         | 0.008     | -22.29                          | 0.49      | 68.76   | 0.063     | 17.04          | 1.57      |
| 9MAI  | Reverse        | 1.06         | 0.006     | -22.50                          | 0.39      | 76.73   | 0.045     | 18.34          | 0.78      |
|       | Forward        | 1.01         | 0.008     | -22.44                          | 0.45      | 65.85   | 0.040     | 16.23          | 0.64      |
| 11MAI | Reverse        | 1.02         | 0.019     | -22.93                          | 0.13      | 66.86   | 0.073     | 15.75          | 1.57      |
|       | Forward        | 0.95         | 0.123     | -22.86                          | 0.15      | 60.53   | 0.061     | 14.30          | 2.06      |
| 15MAI | Reverse        | 1.01         | 0.003     | -22.74                          | 0.15      | 66.29   | 0.025     | 15.32          | 0.57      |
|       | Forward        | 0.97         | 0.976     | -22.69                          | 0.15      | 58.92   | 0.036     | 13.90          | 0.77      |
| 20MAI | Reverse        | 0.99         | 0.014     | -22.32                          | 0.22      | 62.58   | 0.051     | 13.88          | 1.28      |
|       | Forward        | 0.95         | 0.011     | -22.23                          | 0.24      | 54.39   | 0.056     | 13.21          | 1.34      |



**Table S5** Stabilized photovoltaic parameters of regular n-i-p solar cells extracted for perovskite compositions under simulated air mass 1.5 sunlight, comparing maximum power point tracking (MPPT), stabilized voltage and current density at MPPT as a function of excess MAI content.

| Sample | # $\eta_{\text{MPPT}}$ [%] | # $V_{\text{MPPT}}$ [V] | # $i_{\text{MPPT}}$ [mA.cm <sup>-2</sup> ] |
|--------|----------------------------|-------------------------|--------------------------------------------|
| 0MAI   | 16.61746                   | 0.82212                 | -20.21289                                  |
| 3MAI   | 16.53978                   | 0.82725                 | -19.99367                                  |
| 5MAI   | 17.31855                   | 0.85827                 | -20.17841                                  |
| 7MAI   | 18.566                     | 0.91989                 | -20.18294                                  |
| 9MAI   | 18.45632                   | 0.88839                 | -20.81202                                  |
| 11MAI  | 15.60684                   | 0.75088                 | -20.78461                                  |
| 15MAI  | 14.70448                   | 0.79354                 | -18.53016                                  |
| 20MAI  | 13.29198                   | 0.73003                 | -18.20738                                  |

\* Steady state at open-circuit voltage ( $V_{\text{MP}}$ ) and short-circuit ( $I_{\text{MP}}$ ) condition scanned for 5seconds under 1 sun illumination

# Maximum power point tracking for 30 seconds under 1 sun illumination

**Table S6** Extracted integrated current density and the 1st order differentiation calculated energy bandgap from EQE band edge of perovskite solar cells as a function of excess MAI content.

| Sample | integrated Jsc<br>(mA/cm <sup>2</sup> ) | E <sub>g</sub> [eV] |
|--------|-----------------------------------------|---------------------|
| 0MAI   | 22.5272                                 | 1.536               |
| 3MAI   | 22.4346                                 | 1.535               |
| 5MAI   | 22.7472                                 | 1.533               |
| 7MAI   | 22.9179                                 | 1.534               |
| 9MAI   | 22.9024                                 | 1.535               |
| 15MAI  | 22.7345                                 | 1.535               |
| 20MAI  | 22.8743                                 | 1.534               |

## E. References

- 1 W. Shockley and H. J. Queisser, *J Appl Phys*, 1961, **32**, 510–519.
- 2 C. A. Bates and K. W. H. Stevens, *Reports on Progress in Physics*, 1986, **49**, 783–823.
- 3 L. Krückemeier, U. Rau, M. Stolterfoht and T. Kirchartz, *Adv Energy Mater*, 2020, **10**, 1902573.
- 4 W. Tress, N. Marinova, O. Inganäs, Mohammad. K. Nazeeruddin, S. M. Zakeeruddin and M. Graetzel, *Adv Energy Mater*, 2015, **5**, 1400812.
- 5 U. Rau, *Phys Rev B*, 2007, **76**, 085303.
- 6 P. K. Nayak, S. Mahesh, H. J. Snaith and D. Cahen, *Nat Rev Mater*, 2019, **4**, 269–285.
- 7 D. W. de Quilettes, S. M. Vorpahl, S. D. Stranks, H. Nagaoka, G. E. Eperon, M. E. Ziffer, H. J. Snaith and D. S. Ginger, *Science (1979)*, 2015, **348**, 683–686.
- 8 G. Kang, J.-S. Yoon, G.-W. Kim, K. Choi, T. Park, R.-H. Baek and J. Lim, *J Mater Chem A Mater*, 2019, **7**, 25838–25844.
- 9 M. Stolterfoht, M. Grischek, P. Caprioglio, C. M. Wolff, E. Gutierrez-Partida, F. Peña-Camargo, D. Rothhardt, S. Zhang, M. Raoufi, J. Wolansky, M. Abdi-Jalebi, S. D. Stranks, S. Albrecht, T. Kirchartz and D. Neher, *Advanced Materials*, 2020, **32**, 2000080.
- 10 P. Caprioglio, D. S. Cruz, S. Caicedo-Dávila, F. Zu, A. A. Sutanto, F. Peña-Camargo, L. Kegelmann, D. Meggiolaro, L. Gregori, C. M. Wolff, B. Stiller, L. Perdigón-Toro, H. Köbler, B. Li, E. Gutierrez-Partida, I. Lauer mann, A. Abate, N. Koch, F. de Angelis, B. Rech, G. Grancini, D. Abou-Ras, M. K. Nazeeruddin, M. Stolterfoht, S. Albrecht, M. Antonietti and D. Neher, *Energy Environ Sci*, 2021, **14**, 4508–4522.
